# Supplementary material
Source: publisher figshare collection journal article supplement (https://gsapubs.figshare.com/articles/dataset/_/21669482)
Supplement: Supplementary file 1 [file 1]

## Sheet: Zircon Lu-Hf median and geomean
Lu/Hf global dataset							TOTAL DATA
							124476
TOTAL DATA	FILTERED						IGNEOUS	METAMORPHIC
124476	119122						117230	7246
Median	176Lu/177Hf		176Lu/177Hf		2 s.e.		Geomean	176Lu/177Hf	+ 2 s.e.	- 2 s.e.
Age	unfiltered	n.	filtered	n.			Age				n.
53	0.00133486	7338	0.00127873	6874	2.287e-05		52.7121	0.001481	2.01056e-05	1.98363e-05	7149
145	0.00115965	5599	0.001125	5383	1.98779e-05		142.855	0.00124511	1.74498e-05	1.72086e-05	5380
250	0.0012077	9066	0.0011638	8609	1.36037e-05		252.36	0.00123654	1.30744e-05	1.29376e-05	8843
337.1	0.00114022	4823	0.00111	4609	1.73979e-05		340.717	0.00118647	1.63662e-05	1.61435e-05	4686
453	0.00115087	5814	0.00111181	5548	1.66749e-05		453.477	0.00118073	1.59203e-05	1.57085e-05	5589
548.7	0.0008725	7360	0.000824	6977	1.47877e-05		548.699	0.000998573	1.48891e-05	1.46704e-05	6406
633	0.00083	5665	0.000805	5437	1.42043e-05		638.784	0.000916041	1.33968e-05	1.32037e-05	5163
756	0.00108	4009	0.00104	3805	2.18982e-05		754.376	0.00114584	2.09584e-05	2.05819e-05	3869
832	0.001124	4319	0.00108228	4100	1.95181e-05		839.136	0.00117365	1.89191e-05	1.86189e-05	4190
953	0.00088	3416	0.00085	3266	1.84817e-05		952.554	0.000948381	1.75007e-05	1.71836e-05	3168
1051	0.00083643	4398	0.00081625	4220	1.5245e-05		1050.82	0.000917957	1.35237e-05	1.33274e-05	4258
1152	0.0008	3550	0.000779665	3408	1.38473e-05		1150.48	0.000854981	1.28114e-05	1.26223e-05	3430
1237	0.00082	1851	0.00079576	1763	2.04186e-05		1241.44	0.000887178	1.93542e-05	1.8941e-05	1766
1344	0.000978615	1666	0.00095076	1584	2.58267e-05		1347.83	0.00102731	2.46263e-05	2.40498e-05	1640
1449	0.000961	1977	0.000936	1890	2.15614e-05		1450.85	0.00100037	2.07009e-05	2.02812e-05	1939
1559	0.00093991	1837	0.000921	1777	2.39423e-05		1555.48	0.000995909	2.18315e-05	2.13632e-05	1759
1649	0.00105565	2590	0.001025	2507	2.26202e-05		1648.82	0.0010992	2.077e-05	2.03848e-05	2523
1756	0.00093912	4234	0.000907	4037	1.71736e-05		1753.57	0.00100573	1.63195e-05	1.60589e-05	4030
1850	0.00074	5877	0.000723	5737	1.35686e-05		1849.56	0.000845496	1.19944e-05	1.18266e-05	5154
1947	0.00062	2872	0.00060016	2765	1.58028e-05		1949.37	0.000744643	1.53147e-05	1.50061e-05	2369
2048.85	0.00074263	2638	0.00072	2525	1.64204e-05		2049.22	0.000813947	1.58078e-05	1.55067e-05	2366
2144	0.00077983	2569	0.000758	2451	1.59805e-05		2147.55	0.000843909	1.52707e-05	1.49993e-05	2431
2242	0.0007745	1036	0.0007595	998	2.7918e-05		2246.39	0.000839299	2.59642e-05	2.51851e-05	959
2350	0.000698	1378	0.000676939	1299	2.00521e-05		2349.29	0.000778103	2.02784e-05	1.97633e-05	1254
2464	0.000638642	3060	0.000632	3013	1.56055e-05		2459.62	0.000717632	1.22558e-05	1.205e-05	2745
2535	0.000707314	4929	0.000688247	4698	1.04884e-05		2539.69	0.00076416	1.02379e-05	1.01025e-05	4573
2656	0.000693	3737	0.00067036	3573	1.22436e-05		2652.91	0.000759727	1.17129e-05	1.15351e-05	3422
2735	0.000747922	3891	0.000736	3790	1.42786e-05		2740.88	0.00081228	1.27934e-05	1.25951e-05	3598
2851	0.000847	1862	0.000831	1804	2.18596e-05		2849.04	0.000891974	2.05107e-05	2.00497e-05	1767
2948	0.00092	1414	0.000908426	1390	3.83646e-05		2949.83	0.000985412	2.86114e-05	2.78041e-05	1357
3056	0.00095041	1033	0.00093965	1002	3.27137e-05		3052.51	0.00097382	2.89728e-05	2.81357e-05	998
3155.2	0.0009245	1036	0.0009	987	2.66556e-05		3151.6	0.000929164	2.65971e-05	2.5857e-05	1012
3245	0.00095576	1668	0.000926549	1573	2.22287e-05		3246.44	0.000990507	2.22395e-05	2.17512e-05	1635
3347	0.00091	1478	0.000874034	1396	2.2883e-05		3347.41	0.000944824	2.30094e-05	2.24623e-05	1450
3449.6	0.00093717	1316	0.00090277	1247	2.50516e-05		3446.56	0.000966754	2.4873e-05	2.42491e-05	1282
3537	0.00091616	963	0.000911	959	3.6374e-05		3543.19	0.000959128	3.08514e-05	2.98899e-05	936
3647	0.00086841	614	0.0008645	612	4.83633e-05		3647.69	0.000893954	3.54626e-05	3.41095e-05	594
3742	0.000803	581	0.0007955	560	3.37138e-05		3744.67	0.000839011	3.17844e-05	3.06243e-05	569
3844	0.00081506	342	0.00076935	323	4.59215e-05		3843.39	0.000837486	4.83501e-05	4.57111e-05	335
3950	0.000795	229	0.000747315	212	6.76076e-05		3948.31	0.00088038	6.92652e-05	6.42131e-05	219
4022.7	0.00082	277	0.000771895	258	6.3164e-05		4037.06	0.000919237	6.3427e-05	5.9333e-05	261
4138.85	0.000818995	118	0.00078803	112	7.39432e-05		4141.28	0.000862836	7.38966e-05	6.8067e-05	113
4240	0.00081578	40	0.00080278	38	0.000156228		4247.05	0.00095039	0.000162134	0.000138505	37
4339	0.001511	6	0.001511	6	0.000792811		4339.02	0.00113998	0.0010342	0.000542259	6
References
Puetz, S.J. and Condie, K.C., 2019. Time series analysis of mantle cycles Part I: Periodicities and correlations among seven global isotopic databases. Geoscience Frontiers, 10(4), pp.1305-1326.
Reimink, J.R., Davies, J.H.F.L., Chacko, T., Stern, R.A., Heaman, L.M., Sarkar, C., Schaltegger, U., Creaser, R.A. and Pearson, D.G., 2016. No evidence for Hadean continental crust within Earth’s oldest evolved rock unit. Nature Geoscience, 9(10), pp.777-780.
Bauer, A.M., Vervoort, J.D. and Fisher, C.M., 2020. Unraveling the complexity of zircons from the 4.0–2.9 Ga Acasta Gneiss Complex. Geochimica et Cosmochimica Acta, 283, pp.85-102.
Cutts, K., Lana, C., Moreira, H., Alkmim, F. and Peres, G.G., 2020. Zircon U-Pb and Lu-Hf record from high-grade complexes within the Mantiqueira Complex: First evidence of juvenile crustal input at 2.4–2.2 Ga and implications for the Palaeoproterozoic evolution of the São Francisco Craton. Precambrian Research, 338, p.105567.
Schannor, M., Lana, C., Mazoz, A., Narduzzi, F., Cutts, K. and Fonseca, M., 2020. Paleoproterozoic sources for Cordilleran-type Neoproterozoic granitoids from the Araçuaí orogen (SE Brazil): Constraints from Hf isotope zircon composition. Lithos, 378, p.105815.
Li, D., Hollings, P., Chen, H., Sun, X., Tan, C. and Zurevinski, S., 2020. Zircon U–Pb and Lu–Hf systematics of the major terranes of the Western Superior Craton, Canada: Mantle-crust interaction and mechanism (s) of craton formation. Gondwana Research, 78, pp.261-277.
Gao, P. and Santosh, M., 2020. Mesoarchean accretionary mélange and tectonic erosion in the Archean Dharwar Craton, southern India: Plate tectonics in the early Earth. Gondwana Research, 85, pp.291-305.
Gardiner, N.J., Wacey, D., Kirkland, C.L., Johnson, T.E. and Jeon, H., 2019. Zircon U–Pb, Lu–Hf and O isotopes from the 3414 Ma Strelley Pool Formation, East Pilbara Terrane, and the Palaeoarchaean emergence of a cryptic cratonic core. Precambrian Research, 321, pp.64-84.
Gardiner, N.J., Kirkland, C.L., Hollis, J.A., Cawood, P.A., Nebel, O., Szilas, K. and Yakymchuk, C., 2020. North Atlantic Craton architecture revealed by kimberlite-hosted crustal zircons. Earth and Planetary Science Letters, 534, p.116091.
Ge, R., Wilde, S.A., Kemp, A.I., Jeon, H., Martin, L.A., Zhu, W. and Wu, H., 2020. Generation of Eoarchean continental crust from altered mafic rocks derived from a chondritic mantle: The∼ 3.72 Ga Aktash gneisses, Tarim Craton (NW China). Earth and Planetary Science Letters, 538, p.116225.
Wang, J., Su, Y., Zheng, J., Belousova, E.A., Griffin, W.L., Zhou, X. and Dai, H., 2020. Hidden Eoarchean crust in the southwestern Central Asian Orogenic Belt. Lithos, 360, p.105437.
Barbosa, R.G., de Carvalho Lana, C. and Zincone, S.A., 2021. Paleoproterozoic granitic magmatism in the northern São Francisco Craton, NE Brazil: New perspectives from geochemistry, zircon U–Pb geochronology and Hf isotopes. Journal of South American Earth Sciences, 105, p.103004.
Zhou, G., Fisher, C.M., Luo, Y., Pearson, D.G., Li, L., He, Y. and Wu, Y., 2020. A clearer view of crustal evolution: U-Pb, Sm-Nd, and Lu-Hf isotope systematics in five detrital minerals unravel the tectonothermal history of northern China. Geological Society of America Bulletin.
Hoffmann, J.E., Musese, E., Kröner, A., Schneider, K.P., Wong, J., Hofmann, A., Hegner, E., Kasper, H.U., Tusch, J. and Münker, C., 2020. Hafnium-Neodymium isotope, trace element and U-Pb zircon age constraints on the petrogenesis of the 3.44-3.46 Ga Dwalile greenstone remnant, Ancient Gneiss Complex, Swaziland. Precambrian Research, p.105970.
Jayananda, M., Aadhiseshan, K.R., Kusiak, M.A., Wilde, S.A., Sekhamo, K.U., Guitreau, M., Santosh, M. and Gireesh, R.V., 2020. Multi-stage crustal growth and Neoarchean geodynamics in the Eastern Dharwar Craton, southern India. Gondwana Research, 78, pp.228-260.
Zhou, K., Chen, Y.X., Zhang, S.B. and Zheng, Y.F., 2020. Zircon evidence for the Eoarchean (~ 3.7 Ga) crustal remnant in the Sulu Orogen, eastern China. Precambrian Research, 337, p.105529.
Liou, P., Cui, X., Guo, J. and Zhai, M., 2020. Possible link between the oldest supracrustal unit and the oldest rock unit of China. Precambrian Research, 342, p.105672.
Ma, Q., Xu, Y.G., Huang, X.L., Zheng, J.P., Ping, X. and Xia, X.P., 2020. Eoarchean to Paleoproterozoic crustal evolution in the North China Craton: Evidence from U-Pb and Hf-O isotopes of zircons from deep-crustal xenoliths. Geochimica et Cosmochimica Acta, 278, pp.94-109.
Moreira, H., Storey, C., Fowler, M., Seixas, L. and Dunlop, J., 2020. Petrogenetic processes at the tipping point of plate tectonics: Hf-O isotope ternary modelling of Earth's last TTG to sanukitoid transition. Earth and Planetary Science Letters, 551, p.116558.
OʼNeil, J., Boyet, M., Carlson, R.W. and Paquette, J.L., 2013. Half a billion years of reworking of Hadean mafic crust to produce the Nuvvuagittuq Eoarchean felsic crust. Earth and Planetary Science Letters, 379, pp.13-25.
Oliveira, E.P., McNaughton, N.J., Zincone, S.A. and Talavera, C., 2020. Birthplace of the São Francisco Craton, Brazil: Evidence from 3.60 to 3.64 Ga Gneisses of the Mairi Gneiss Complex. Terra Nova, 32(4), pp.281-289.
Petersson, A., Kemp, A.I. and Whitehouse, M.J., 2019. A Yilgarn seed to the Pilbara Craton (Australia)? Evidence from inherited zircons. Geology, 47(11), pp.1098-1102.
Ranjan, S., Upadhyay, D., Pruseth, K.L. and Nanda, J.K., 2020. Detrital zircon evidence for change in geodynamic regime of continental crust formation 3.7–3.6 billion years ago. Earth and Planetary Science Letters, 538, p.116206.
Ranjan, S., Upadhyay, D., Abhinay, K. and Srikantappa, C., 2020. Paleoarchean and Neoarchean Tonalite–Trondhjemite–Granodiorite (TTG) and granite magmatism in the Western Dharwar Craton, southern India: Implications for Archean continental growth and geodynamics. Precambrian Research, 340, p.105630.
Reimink, J.R., Pearson, D.G., Shirey, S.B., Carlson, R.W. and Ketchum, J.W.F., 2019. Onset of new, progressive crustal growth in the central Slave craton at 3.55 Ga. Geochem. Perspect. Lett., 10, pp.8-13.
Zeh, A., Wilson, A.H. and Gerdes, A., 2020. Zircon U-Pb-Hf isotope systematics of Transvaal Supergroup–Constraints for the geodynamic evolution of the Kaapvaal Craton and its hinterland between 2.65 and 2.06 Ga. Precambrian Research, 345, p.105760.

## Sheet: Zircon Lu-Hf compilation
Lu/Hf global compilation
Age (Ma)	176Lu/177Hf		References
0.05	0.00092402		Puetz, S.J. and Condie, K.C., 2019. Time series analysis of mantle cycles Part I: Periodicities and correlations among seven global isotopic databases. Geoscience Frontiers, 10(4), pp.1305-1326.
0.05	0.0013658		Reimink, J.R., Davies, J.H.F.L., Chacko, T., Stern, R.A., Heaman, L.M., Sarkar, C., Schaltegger, U., Creaser, R.A. and Pearson, D.G., 2016. No evidence for Hadean continental crust within Earth’s oldest evolved rock unit. Nature Geoscience, 9(10), pp.777-780.
0.05	0.00158371		Bauer, A.M., Vervoort, J.D. and Fisher, C.M., 2020. Unraveling the complexity of zircons from the 4.0–2.9 Ga Acasta Gneiss Complex. Geochimica et Cosmochimica Acta, 283, pp.85-102.
0.05	0.00216768		Cutts, K., Lana, C., Moreira, H., Alkmim, F. and Peres, G.G., 2020. Zircon U-Pb and Lu-Hf record from high-grade complexes within the Mantiqueira Complex: First evidence of juvenile crustal input at 2.4–2.2 Ga and implications for the Palaeoproterozoic evolution of the São Francisco Craton. Precambrian Research, 338, p.105567.
0.05	0.00234619		Schannor, M., Lana, C., Mazoz, A., Narduzzi, F., Cutts, K. and Fonseca, M., 2020. Paleoproterozoic sources for Cordilleran-type Neoproterozoic granitoids from the Araçuaí orogen (SE Brazil): Constraints from Hf isotope zircon composition. Lithos, 378, p.105815.
0.05	0.00314505		Li, D., Hollings, P., Chen, H., Sun, X., Tan, C. and Zurevinski, S., 2020. Zircon U–Pb and Lu–Hf systematics of the major terranes of the Western Superior Craton, Canada: Mantle-crust interaction and mechanism (s) of craton formation. Gondwana Research, 78, pp.261-277.
0.05	0.00383933		Gao, P. and Santosh, M., 2020. Mesoarchean accretionary mélange and tectonic erosion in the Archean Dharwar Craton, southern India: Plate tectonics in the early Earth. Gondwana Research, 85, pp.291-305.
0.05	0.00389162		Gardiner, N.J., Wacey, D., Kirkland, C.L., Johnson, T.E. and Jeon, H., 2019. Zircon U–Pb, Lu–Hf and O isotopes from the 3414 Ma Strelley Pool Formation, East Pilbara Terrane, and the Palaeoarchaean emergence of a cryptic cratonic core. Precambrian Research, 321, pp.64-84.
0.05	0.00526119		Gardiner, N.J., Kirkland, C.L., Hollis, J.A., Cawood, P.A., Nebel, O., Szilas, K. and Yakymchuk, C., 2020. North Atlantic Craton architecture revealed by kimberlite-hosted crustal zircons. Earth and Planetary Science Letters, 534, p.116091.
0.05	0.006017		Ge, R., Wilde, S.A., Kemp, A.I., Jeon, H., Martin, L.A., Zhu, W. and Wu, H., 2020. Generation of Eoarchean continental crust from altered mafic rocks derived from a chondritic mantle: The∼ 3.72 Ga Aktash gneisses, Tarim Craton (NW China). Earth and Planetary Science Letters, 538, p.116225.
0.05	0.00631077		Wang, J., Su, Y., Zheng, J., Belousova, E.A., Griffin, W.L., Zhou, X. and Dai, H., 2020. Hidden Eoarchean crust in the southwestern Central Asian Orogenic Belt. Lithos, 360, p.105437.
0.05	0.00666348		Barbosa, R.G., de Carvalho Lana, C. and Zincone, S.A., 2021. Paleoproterozoic granitic magmatism in the northern São Francisco Craton, NE Brazil: New perspectives from geochemistry, zircon U–Pb geochronology and Hf isotopes. Journal of South American Earth Sciences, 105, p.103004.
0.05	0.00916351		Zhou, G., Fisher, C.M., Luo, Y., Pearson, D.G., Li, L., He, Y. and Wu, Y., 2020. A clearer view of crustal evolution: U-Pb, Sm-Nd, and Lu-Hf isotope systematics in five detrital minerals unravel the tectonothermal history of northern China. Geological Society of America Bulletin.
0.05	0.0112236		Hoffmann, J.E., Musese, E., Kröner, A., Schneider, K.P., Wong, J., Hofmann, A., Hegner, E., Kasper, H.U., Tusch, J. and Münker, C., 2020. Hafnium-Neodymium isotope, trace element and U-Pb zircon age constraints on the petrogenesis of the 3.44-3.46 Ga Dwalile greenstone remnant, Ancient Gneiss Complex, Swaziland. Precambrian Research, p.105970.
0.093	0.00545101		Jayananda, M., Aadhiseshan, K.R., Kusiak, M.A., Wilde, S.A., Sekhamo, K.U., Guitreau, M., Santosh, M. and Gireesh, R.V., 2020. Multi-stage crustal growth and Neoarchean geodynamics in the Eastern Dharwar Craton, southern India. Gondwana Research, 78, pp.228-260.
0.1	0.00238632		Zhou, K., Chen, Y.X., Zhang, S.B. and Zheng, Y.F., 2020. Zircon evidence for the Eoarchean (~ 3.7 Ga) crustal remnant in the Sulu Orogen, eastern China. Precambrian Research, 337, p.105529.
0.1	0.00894		Liou, P., Cui, X., Guo, J. and Zhai, M., 2020. Possible link between the oldest supracrustal unit and the oldest rock unit of China. Precambrian Research, 342, p.105672.
0.1	0.00898		Ma, Q., Xu, Y.G., Huang, X.L., Zheng, J.P., Ping, X. and Xia, X.P., 2020. Eoarchean to Paleoproterozoic crustal evolution in the North China Craton: Evidence from U-Pb and Hf-O isotopes of zircons from deep-crustal xenoliths. Geochimica et Cosmochimica Acta, 278, pp.94-109.
0.1	0.00898		Moreira, H., Storey, C., Fowler, M., Seixas, L. and Dunlop, J., 2020. Petrogenetic processes at the tipping point of plate tectonics: Hf-O isotope ternary modelling of Earth's last TTG to sanukitoid transition. Earth and Planetary Science Letters, 551, p.116558.
0.1	0.00926		OʼNeil, J., Boyet, M., Carlson, R.W. and Paquette, J.L., 2013. Half a billion years of reworking of Hadean mafic crust to produce the Nuvvuagittuq Eoarchean felsic crust. Earth and Planetary Science Letters, 379, pp.13-25.
0.1	0.00927		Oliveira, E.P., McNaughton, N.J., Zincone, S.A. and Talavera, C., 2020. Birthplace of the São Francisco Craton, Brazil: Evidence from 3.60 to 3.64 Ga Gneisses of the Mairi Gneiss Complex. Terra Nova, 32(4), pp.281-289.
0.1	0.00928		Petersson, A., Kemp, A.I. and Whitehouse, M.J., 2019. A Yilgarn seed to the Pilbara Craton (Australia)? Evidence from inherited zircons. Geology, 47(11), pp.1098-1102.
0.108	0.00280799		Ranjan, S., Upadhyay, D., Pruseth, K.L. and Nanda, J.K., 2020. Detrital zircon evidence for change in geodynamic regime of continental crust formation 3.7–3.6 billion years ago. Earth and Planetary Science Letters, 538, p.116206.
0.152	0.00514487		Ranjan, S., Upadhyay, D., Abhinay, K. and Srikantappa, C., 2020. Paleoarchean and Neoarchean Tonalite–Trondhjemite–Granodiorite (TTG) and granite magmatism in the Western Dharwar Craton, southern India: Implications for Archean continental growth and geodynamics. Precambrian Research, 340, p.105630.
0.154	0.00447623		Reimink, J.R., Pearson, D.G., Shirey, S.B., Carlson, R.W. and Ketchum, J.W.F., 2019. Onset of new, progressive crustal growth in the central Slave craton at 3.55 Ga. Geochem. Perspect. Lett., 10, pp.8-13.
0.155	0.0101433		Zeh, A., Wilson, A.H. and Gerdes, A., 2020. Zircon U-Pb-Hf isotope systematics of Transvaal Supergroup–Constraints for the geodynamic evolution of the Kaapvaal Craton and its hinterland between 2.65 and 2.06 Ga. Precambrian Research, 345, p.105760.
0.162	0.00151969
0.169	0.00656735
0.175	0.00418213
0.175	0.0092326
0.177	0.00931837
0.179	0.0107642
0.179	0.0118577
0.18	0.00358193
0.18	0.00563398
0.18	0.00581593
0.18	0.00585392
0.18	0.00634118
0.182	0.0039715
0.182	0.00992369
0.183	0.00067766
0.184	0.00157968
0.184	0.00240736
0.184	0.0025697
0.186	0.00292294
0.186	0.00643777
0.188	0.00526725
0.189	0.00916914
0.191	0.00492732
0.193	0.0011392
0.193	0.00472383
0.193	0.00647131
0.194	0.00974575
0.199	0.00182945
0.2	0.0016717
0.2	0.00209727
0.2	0.0040284
0.2	0.00403725
0.2	0.00490353
0.2	0.00499776
0.2	0.005001
0.2	0.00578061
0.2	0.00580886
0.2	0.00717184
0.202	0.0106798
0.204	0.0013662
0.204	0.00404883
0.205	0.00029775
0.207	0.00820815
0.207	0.00875427
0.208	0.00404687
0.209	0.00259122
0.21	0.0008494
0.21	0.00310042
0.21	0.0032527
0.21	0.0033804
0.21	0.00492135
0.211	0.00396268
0.211	0.0052698
0.213	0.00235802
0.213	0.00507027
0.214	0.002709
0.214	0.00539738
0.214	0.00881144
0.217	0.00372778
0.217	0.00441273
0.219	0.00087877
0.219	0.0105383
0.22	0.00664359
0.222	0.00095766
0.229	0.00560156
0.23	0.00531406
0.234	0.00477203
0.238	0.00171126
0.238	0.00174309
0.239	0.00379902
0.241	0.00076401
0.244	0.00105627
0.244	0.0023417
0.246	0.00477397
0.248	0.00347892
0.249	0.0031389
0.249	0.00682321
0.254	0.00147105
0.258	0.00147453
0.26	0.00254765
0.267	0.0010297
0.269	0.00140815
0.273	0.00205512
0.28073	0.000447
0.280732	0.000672
0.28078	0.000905
0.28079	0.000609
0.2809	0.00069
0.281	0.00085
0.2814	0.000803
0.309	0.00193149
0.349	0.00352146
0.359	0.00197015
0.363	0.0032696
0.38	0.00080316
0.38	0.00081363
0.38	0.00086005
0.38	0.0009681
0.38	0.00101535
0.38	0.00115461
0.38	0.00116225
0.38	0.00127053
0.38	0.00127636
0.38	0.00138146
0.38	0.00138811
0.38	0.00143068
0.38	0.00150713
0.38	0.00174998
0.38	0.00195883
0.38	0.002049
0.38	0.00253588
0.38	0.00270754
0.38	0.00270882
0.383	0.00240492
0.4	0.00059335
0.402	0.00359427
0.409	0.00074684
0.414	0.00237121
0.423	0.00357653
0.45	0.0053289
0.458	0.00165303
0.463	0.00359045
0.469	0.00357499
0.477	0.00364364
0.479	0.00456228
0.494	0.00162059
0.5	0.00131426
0.503	0.00459271
0.51	0.00260884
0.523	0.00777786
0.548	0.00017801
0.555	0.00287908
0.6	0.00106665
0.6	0.0013017
0.634	0.00471702
0.69	0.00098842
0.694	0.00209927
0.7	0.00082306
0.8	0.00085348
0.8	0.0011317
0.8	0.00136288
0.859	0.00482718
0.9	0.00113154
1	0.00058342
1	0.000924
1	0.00102
1	0.00106
1	0.00107
1	0.00123
1	0.00144
1	0.00162
1	0.00176
1	0.00199
1	0.00206
1	0.0021
1	0.00224
1	0.00233
1	0.00258
1	0.00275
1	0.00384
1	0.00409
1	0.00438
1	0.00453
1	0.00508
1	0.00715
1	0.00806
1	0.00847
1	0.01008
1	0.01127
1	0.01142
1.09	0.00253499
1.1	0.00059596
1.1	0.00073
1.1	0.00102
1.1	0.00118
1.1	0.00121
1.1	0.00157
1.1	0.00167
1.1	0.002
1.1	0.00312
1.2	0.00231
1.2	0.00299
1.2	0.00325
1.2	0.00343
1.2	0.00345
1.2	0.00378
1.2	0.00379
1.2	0.00391
1.2	0.00411
1.2	0.00415
1.2	0.00864
1.3	0.00046
1.3	0.00048
1.3	0.00066551
1.3	0.00074
1.3	0.00081716
1.3	0.00082
1.3	0.001
1.3	0.00115
1.3	0.00116
1.3	0.00116
1.3	0.0012
1.3	0.00122
1.3	0.00124
1.3	0.00131
1.3	0.00138
1.3	0.00147
1.3	0.00152
1.3	0.00154
1.3	0.00164
1.3	0.00164
1.3	0.00169
1.3	0.00169
1.3	0.0017
1.3	0.00172
1.3	0.00182
1.3	0.00185
1.3	0.00204
1.3	0.00226
1.3	0.00278
1.3	0.00387
1.3	0.00428
1.3	0.00497
1.4	0.00085995
1.4	0.00772223
1.5	0.00107282
1.5	0.0012122
1.7	0.001428
1.7	0.00229
1.7	0.00244725
1.7	0.00266
1.7	0.00274
1.7	0.00349
1.7	0.004
1.7	0.00621
1.7	0.00836
2.2	0.00217
2.2	0.00278
2.3	0.00080985
2.3	0.00158
2.6	0.00336055
2.7	0.000159
2.7	0.00225179
2.8	0.000337
2.8	0.000356
2.9	0.000304
2.9	0.000389
2.9	0.00087264
3	0.000433
3	0.000724
3	0.00074615
3	0.00090035
3	0.00107919
3	0.00137329
3	0.00143164
3	0.00408
3.1	0.00094739
3.1	0.00102331
3.1	0.00285557
3.2	0.00073754
3.2	0.00086607
3.2	0.00101015
3.2	0.00102921
3.2	0.00107152
3.2	0.00110655
3.2	0.00118932
3.2	0.00137265
3.2	0.00145572
3.3	0.00041374
3.3	0.00083005
3.3	0.00106625
3.3	0.00110244
3.3	0.00124355
3.3	0.00144042
3.4	0.00079703
3.4	0.00093478
3.4	0.00096881
3.4	0.00117043
3.4	0.00118358
3.4	0.00122828
3.5	0.00088627
3.5	0.00099232
3.5	0.00102727
3.5	0.00122048
3.5	0.00123047
3.5	0.00134322
3.5	0.00159766
3.7	0.000661
3.7	0.00080383
3.7	0.00158048
3.8	0.00147941
3.8	0.00180907
4	0.00081
4	0.00088141
4	0.0008886
4	0.00118702
4	0.001255
4	0.00134
4.1	0.00057421
4.1	0.00087079
4.1	0.00117568
4.1	0.00169373
4.2	0.00098204
4.3	0.000471
4.3	0.00075588
4.3	0.00085488
4.3	0.00095211
4.3	0.00115826
4.3	0.00127986
4.3	0.00151452
4.3	0.00154898
4.3	0.00246534
4.4	0.000328
4.4	0.00069517
4.4	0.00099138
4.4	0.0010134
4.5	0.00204144
4.6	0.00080189
4.6	0.00178411
4.8	0.00085233
4.8	0.001593
4.9	0.00064645
4.9	0.00123778
5	0.000418
5	0.00074151
5	0.0008114
5	0.00095638
5	0.00123
5.1	0.00046125
5.1	0.00101306
5.2	0.00014518
5.2	0.00084783
5.2	0.00094503
5.2	0.00095094
5.2	0.00105165
5.2	0.00107369
5.2	0.00121475
5.2	0.0013193
5.2	0.00140742
5.2	0.00149326
5.3	0.000563
5.3	0.00088967
5.3	0.00093346
5.3	0.00109273
5.3	0.00110347
5.3	0.00114463
5.3	0.00116552
5.3	0.00120481
5.3	0.00130232
5.3	0.00135037
5.3	0.00137415
5.3	0.00148529
5.3	0.00163667
5.3	0.00317942
5.3	0.0032921
5.3	0.00513248
5.3	0.00533216
5.3	0.00538605
5.3	0.0054944
5.3	0.006118
5.3	0.00665061
5.3	0.00842545
5.3	0.00904027
5.4	0.000576
5.4	0.00104654
5.4	0.00106742
5.4	0.00119164
5.4	0.00120748
5.4	0.00134606
5.4	0.00135079
5.4	0.00152711
5.4	0.00165994
5.5	0.00053386
5.5	0.000723
5.5	0.000791
5.5	0.00088025
5.5	0.00091467
5.5	0.00095237
5.5	0.00116887
5.5	0.00118165
5.5	0.00125707
5.5	0.00134704
5.5	0.0013513
5.5	0.001517
5.5	0.00159391
5.5	0.00186398
5.6	0.000557
5.6	0.0011067
5.6	0.001693
5.6	0.00180026
5.6	0.001944
5.7	0.00083243
5.7	0.00096061
5.7	0.00096711
5.7	0.00100677
5.7	0.00101956
5.7	0.00110816
5.7	0.001193
5.7	0.00136208
5.8	0.00053394
5.8	0.00085069
5.8	0.00107281
5.9	0.000282
5.9	0.00082752
5.9	0.00098235
5.9	0.00107553
5.9	0.00110601
5.9	0.00114086
5.9	0.00119121
5.9	0.00121386
5.9	0.001513
5.9	0.001611
5.9	0.001765
5.9	0.001771
6	0.0007677
6	0.00097451
6	0.00102
6	0.00108183
6	0.00117641
6	0.0014093
6	0.00162
6	0.00184
6.1	0.00069156
6.1	0.00080436
6.1	0.000812
6.1	0.00083257
6.1	0.0008451
6.1	0.00109717
6.1	0.0011079
6.1	0.001316
6.1	0.001458
6.1	0.001678
6.1	0.0016865
6.1	0.00176392
6.1	0.001816
6.1	0.00193805
6.2	0.000357
6.2	0.00061265
6.2	0.00062591
6.2	0.00066023
6.2	0.00092378
6.2	0.000936
6.2	0.00101793
6.2	0.00106113
6.2	0.001114
6.2	0.00126152
6.2	0.001303
6.2	0.00191009
6.3	0.000825
6.3	0.000826
6.3	0.00086551
6.3	0.000958
6.3	0.000968
6.3	0.00100559
6.3	0.00104215
6.3	0.00109
6.3	0.001307
6.3	0.00142828
6.3	0.00149237
6.3	0.002961
6.4	0.00025
6.4	0.00073666
6.4	0.00080738
6.4	0.00081906
6.4	0.00090424
6.4	0.00094731
6.4	0.00097026
6.4	0.00101143
6.4	0.0010419
6.4	0.00106944
6.4	0.00108709
6.4	0.00110054
6.4	0.00112819
6.4	0.00113339
6.4	0.00124946
6.4	0.00131578
6.4	0.00142629
6.4	0.00178
6.5	0.000559
6.5	0.00076908
6.5	0.0008104
6.5	0.00085234
6.5	0.0008724
6.6	0.00054747
6.6	0.00065702
6.6	0.00070905
6.6	0.000739
6.6	0.000834
6.6	0.00106027
6.6	0.00114052
6.6	0.00114348
6.6	0.00138787
6.6	0.00176537
6.7	0.00094716
6.7	0.00108353
6.7	0.00110995
6.7	0.00126888
6.8	0.000286
6.8	0.000442
6.8	0.00054155
6.8	0.00074352
6.8	0.00094777
6.8	0.00095663
6.8	0.00096184
6.8	0.00130186
6.8	0.00142915
6.8	0.00185929
6.8	0.00205869
6.9	0.000364
6.9	0.000381
6.9	0.0005297
6.9	0.00114386
6.9	0.00164685
6.9	0.00341642
7	2e-05
7	0.00085
7.1	0.00099
7.1	0.0014199
7.1	0.00170344
7.1	0.001836
7.2	2e-05
7.2	0.000396
7.2	0.000519
7.2	0.000553
7.2	0.000687
7.2	0.00151869
7.2	0.00156201
7.2	0.0019397
7.2	0.00208842
7.3	0.000818
7.3	0.001181
7.3	0.00127406
7.3	0.00155076
7.3	0.0017025
7.3	0.00176689
7.3	0.00190703
7.4	0.000409
7.4	0.001049
7.4	0.001136
7.4	0.00132888
7.4	0.0015073
7.4	0.00206238
7.4	0.00249263
7.4	0.00283442
7.5	0.000493
7.5	0.000746
7.5	0.00124865
7.5	0.00180278
7.5	0.00183816
7.5	0.00206445
7.6	0.00057828
7.6	0.00061
7.6	0.00071523
7.6	0.000857
7.6	0.00198424
7.7	1.8e-05
7.7	2e-05
7.7	2.6e-05
7.7	0.00096114
7.7	0.00207012
7.8	0.000399
7.8	0.001062
7.8	0.00118867
7.9	2e-05
7.9	0.000915
7.9	0.000931
7.9	0.00172366
7.9	0.001939
8	2e-05
8	2.2e-05
8	0.002608
8.1	0.00083217
8.1	0.002736
8.2	1.5e-05
8.2	1.9e-05
8.2	2.2e-05
8.2	0.001389
8.2	0.001552
8.2	0.002131
8.2	0.006811
8.3	1.7e-05
8.3	0.00079352
8.3	0.00089115
8.3	0.001206
8.3	0.001245
8.3	0.00148643
8.3	0.001791
8.3	0.001953
8.4	1.3e-05
8.4	0.000489
8.4	0.000613
8.4	0.000716
8.4	0.00075557
8.4	0.00076741
8.4	0.00117851
8.4	0.002071
8.5	1.6e-05
8.5	1.8e-05
8.5	0.000444
8.5	0.000499
8.5	0.002485
8.6	1.7e-05
8.6	0.00083924
8.6	0.00097694
8.7	1.4e-05
8.7	1.7e-05
8.7	1.8e-05
8.7	2.6e-05
8.7	0.000926
8.7	0.00102213
8.8	1.9e-05
8.8	2e-05
8.8	0.00168159
8.8	0.00171
8.9	0.000645
8.9	0.000699
9	1.5e-05
9	1.6e-05
9	1.8e-05
9	0.000612
9	0.000625
9	0.00135301
9	0.00152929
9	0.00202
9	0.0021447
9	0.00245
9.1	1.9e-05
9.1	0.000511
9.1	0.000573
9.1	0.000598
9.1	0.00095036
9.1	0.001008
9.1	0.00138089
9.1	0.00142325
9.1	0.00175194
9.2	0.00167323
9.2	0.00255077
9.2	0.00356624
9.3	2.6e-05
9.3	0.000522
9.3	0.00065769
9.3	0.000821
9.3	0.00120625
9.3	0.00170642
9.3	0.00203935
9.3	0.002265
9.4	2e-05
9.4	0.000525
9.4	0.00061863
9.4	0.00065603
9.4	0.000866
9.4	0.00127394
9.4	0.0014609
9.4	0.00148101
9.4	0.00168308
9.5	1.9e-05
9.5	0.00051
9.5	0.000631
9.5	0.000976
9.5	0.00101898
9.5	0.00123414
9.5	0.00157107
9.6	0.00122278
9.6	0.00132957
9.7	0.00089185
9.7	0.00114873
9.7	0.00197
9.8	0.00103871
9.9	0.00047688
10	0.00080918
10	0.00093854
10	0.00109
10	0.00688
10	0.00693
10	0.00693
10.1	0.00168857
10.3	0.0005
10.3	0.0005
10.3	0.0005
10.3	0.0006
10.3	0.0006
10.3	0.0006
10.3	0.0006
10.3	0.0006
10.3	0.0006
10.3	0.0007
10.3	0.0007
10.3	0.0007
10.3	0.0007
10.3	0.0008
10.3	0.0008
10.3	0.0008
10.3	0.0008
10.3	0.0009
10.3	0.0009
10.3	0.0011
10.3	0.00180685
10.4	0.00163754
10.8	2.2e-05
10.8	0.00040191
10.8	0.00140166
10.8	0.001971
10.9	0.00071521
11	0.00111081
11	0.00113
11	0.00148041
11.2	0.00051
11.2	0.00058
11.2	0.00059
11.2	0.00061
11.2	0.00064
11.2	0.00074
11.2	0.00075
11.2	0.00083
11.2	0.00088
11.2	0.00093
11.2	0.00095
11.2	0.00096
11.2	0.00101
11.2	0.00107
11.2	0.00107
11.2	0.00108
11.2	0.00108
11.2	0.00112
11.2	0.00163
11.2	0.00175
11.3	0.0006
11.3	0.0006
11.3	0.0007
11.3	0.0007
11.3	0.0008
11.3	0.0008
11.3	0.0009
11.3	0.0009
11.3	0.0009
11.3	0.0009
11.3	0.0009
11.3	0.0009
11.3	0.0009
11.3	0.0009
11.3	0.0009
11.3	0.001
11.3	0.001
11.3	0.001
11.3	0.0011
11.3	0.0011
11.3	0.0012
11.3	0.0013
11.3	0.0013
11.3	0.0013
11.3	0.0032
11.4	0.00133876
11.7	0.00181012
11.8	0.00364131
11.8	0.004817
11.8	0.005415
11.9	0.00101471
11.9	0.00101714
11.9	0.001327
11.9	0.00151
11.9	0.002566
12	0.001235
12	0.00143727
12	0.00149
12.1	0.001235
12.1	0.00160492
12.2	1.9e-05
12.2	0.00224349
12.3	0.00114546
12.3	0.00148796
12.3	0.002252
12.3	0.002939
12.4	0.00083215
12.8	0.00230653
12.9	0.0008124
12.9	0.00206798
13	0.0004
13	0.00066
13	0.0008051
13.1	0.00084041
13.2	0.00112539
13.2	0.00202446
13.5	0.00139081
13.6	0.00229383
13.8	0.00084322
13.8	0.00107231
13.9	0.00070053
13.9	0.001602
14	0.00079331
14	0.0008
14	0.00086699
14	0.00093657
14.2	0.00095787
14.3	0.00084084
14.4	0.00054665
14.5	0.00290354
14.7	0.00266375
14.8	0.00052
14.8	0.00095
14.8	0.00097
14.8	0.00113
14.8	0.00117
14.8	0.00126
14.8	0.0015
14.8	0.00153
14.8	0.00163
14.8	0.00208234
14.8	0.00244
14.9	0.00043
14.9	0.00056
14.9	0.00057
14.9	0.00059
14.9	0.00064
14.9	0.00066
14.9	0.00077
14.9	0.00077
14.9	0.00079
14.9	0.0008
14.9	0.00086
14.9	0.00091
14.9	0.00096
14.9	0.00099
14.9	0.00102
14.9	0.00102
14.9	0.00109
14.9	0.00124
14.9	0.00126
14.9	0.00168942
14.9	0.0019
14.9	0.00486951
15	0.00042076
15	0.00063
15	0.00076998
15	0.00090452
15	0.003133
15.1	0.0017
15.1	0.00187
15.1	0.00229
15.1	0.0024
15.1	0.0027
15.1	0.00281
15.1	0.00288
15.1	0.00297
15.1	0.00321
15.1	0.00337
15.4	0.00126509
15.6	0.00061276
15.6	0.00100448
15.6	0.00108429
15.7	0.00160453
15.7	0.00188419
15.7	0.00247206
15.8	0.00081935
15.8	0.0010213
15.8	0.00141905
15.8	0.00145171
15.8	0.0019
15.9	0.00139008
15.9	0.00170415
15.9	0.00185372
16	0.00078747
16	0.00078991
16	0.00082
16	0.0009
16	0.00102
16	0.00117581
16	0.00121
16	0.00125
16	0.00162
16	0.01457
16	0.01458
16	0.01459
16	0.01462
16.1	0.0010736
16.1	0.00114738
16.1	0.00219715
16.2	0.0003
16.2	0.00078347
16.2	0.00104283
16.2	0.00119049
16.2	0.00122985
16.2	0.00123819
16.2	0.00143309
16.2	0.00222722
16.3	0.00086001
16.3	0.00093658
16.3	0.00222132
16.3	0.00295471
16.4	0.00059698
16.4	0.00063757
16.4	0.00107292
16.4	0.00116126
16.4	0.00120085
16.4	0.00123298
16.4	0.00142152
16.4	0.00232773
16.4	0.00246027
16.5	0.00092983
16.5	0.00110252
16.5	0.00113814
16.5	0.0014068
16.6	0.00092366
16.6	0.00095979
16.6	0.00109417
16.6	0.00131573
16.6	0.00209895
16.6	0.002135
16.7	0.00058273
16.7	0.00096826
16.7	0.0009905
16.7	0.00101754
16.7	0.00101898
16.7	0.00110516
16.7	0.00136212
16.7	0.00140406
16.7	0.00250626
16.7	0.00271609
16.8	0.000182
16.8	0.000213
16.8	0.000514
16.8	0.000528
16.8	0.000596
16.8	0.00065
16.8	0.000691
16.8	0.000706
16.8	0.000724
16.8	0.00072553
16.8	0.000752
16.8	0.000783
16.8	0.000806
16.8	0.000816
16.8	0.001036
16.8	0.00109
16.8	0.00110001
16.8	0.0013
16.8	0.00231294
16.9	0.00081452
16.9	0.00086779
16.9	0.0010813
16.9	0.00109709
16.9	0.00122676
16.9	0.00139801
16.9	0.00164433
16.9	0.0017262
16.9	0.00196297
17	0.0005479
17	0.0009789
17	0.001
17	0.00105
17	0.00147
17.1	0.00244646
17.1	0.00282944
17.2	0.00067602
17.2	0.00144145
17.2	0.00152041
17.2	0.00351007
17.3	0.0005908
17.3	0.0013
17.4	0.00061602
17.4	0.00083886
17.4	0.0011173
17.4	0.0011591
17.4	0.00128077
17.4	0.00146735
17.4	0.00155123
17.4	0.00244961
17.4	0.0026
17.5	0.00054476
17.5	0.00077385
17.5	0.00081861
17.5	0.00135094
17.5	0.00217036
17.5	0.0026
17.5	0.00295826
17.5	0.00337943
17.6	0.00132982
17.6	0.002092
17.6	0.0023
17.6	0.0023
17.6	0.0027
17.6	0.00301919
17.7	0.00179591
17.7	0.004271
17.8	0.00139906
17.8	0.0014
17.8	0.00149831
17.8	0.00156538
17.8	0.0016
17.8	0.00165434
17.8	0.0022
17.8	0.00291124
17.9	0.0016
17.9	0.00215555
17.9	0.0025
18	0.000427
18	0.00109
18	0.001168
18	0.00126
18	0.00164709
18	0.0018
18	0.00192
18	0.002
18	0.0021
18	0.002578
18	0.004203
18.1	0.0015
18.1	0.0019
18.1	0.0024033
18.1	0.0025
18.1	0.0028
18.2	0.00143
18.2	0.0018
18.2	0.0023
18.2	0.0024
18.2	0.0028
18.3	0.0009
18.3	0.00154265
18.3	0.0018
18.3	0.0022418
18.3	0.0025
18.3	0.0026
18.4	0.00135703
18.4	0.00176
18.4	0.00198696
18.5	0.00066221
18.5	0.00082129
18.5	0.00125988
18.5	0.00145
18.5	0.00146419
18.5	0.001697
18.5	0.0019
18.5	0.00237063
18.5	0.0024
18.5	0.0024
18.5	0.00273926
18.5	0.0029
18.5	0.004205
18.6	0.0011004
18.6	0.00141
18.6	0.00147075
18.6	0.001687
18.7	0.0012
18.7	0.00133354
18.7	0.00133597
18.7	0.0015
18.7	0.00164338
18.7	0.0017
18.7	0.00184632
18.7	0.00293
18.7	0.00297
18.8	0.00092775
18.8	0.0013
18.8	0.00137573
18.8	0.00149139
18.8	0.00152675
18.8	0.0019
18.8	0.0021
18.8	0.0023
18.8	0.00234636
18.8	0.0027
18.9	0.00147777
18.9	0.00154681
18.9	0.00160492
18.9	0.0017
18.9	0.0018
18.9	0.00198817
18.9	0.0023
19	0.0006
19	0.00115618
19	0.00116
19	0.00139761
19	0.00140732
19	0.00149929
19	0.0017
19	0.002155
19	0.0023
19.1	0.00063232
19.1	0.00151068
19.1	0.0016
19.1	0.00163588
19.1	0.00199838
19.1	0.00213212
19.1	0.00246026
19.1	0.0028
19.2	0.000326
19.2	0.0007904
19.2	0.00105021
19.2	0.00129274
19.2	0.0013
19.2	0.00137568
19.2	0.00151852
19.2	0.00159877
19.2	0.00172941
19.2	0.00227045
19.3	0.00081936
19.3	0.00137395
19.3	0.00141972
19.3	0.001457
19.3	0.00167345
19.4	0.00124563
19.4	0.00137874
19.4	0.0016
19.4	0.00187271
19.4	0.00206048
19.4	0.00213098
19.4	0.00254918
19.5	0.0019467
19.5	0.00248016
19.6	0.00127567
19.6	0.00146527
19.6	0.00153199
19.6	0.002033
19.6	0.00217032
19.7	0.00154679
19.7	0.00184098
19.7	0.00232627
19.8	0.00079134
19.8	0.00122917
19.8	0.0013
19.8	0.0013
19.8	0.001677
19.8	0.00186641
19.8	0.00193444
19.8	0.00260953
19.9	0.0012851
19.9	0.00131373
19.9	0.00216072
20	0.00068
20	0.00095
20	0.0010603
20	0.00118432
20	0.00146945
20	0.001597
20	0.00201
20.1	0.00052
20.1	0.00117012
20.1	0.00155449
20.1	0.00155544
20.1	0.00191923
20.1	0.00192322
20.1	0.0020543
20.2	0.00164818
20.2	0.00194904
20.3	0.00114244
20.3	0.0012
20.3	0.00142064
20.3	0.00152047
20.3	0.0016221
20.3	0.00165005
20.3	0.00192529
20.3	0.00192737
20.3	0.00194067
20.3	0.002202
20.4	0.00065701
20.4	0.00123725
20.4	0.00139672
20.4	0.00142335
20.4	0.00143903
20.4	0.00154433
20.4	0.00155684
20.4	0.00172381
20.5	0.00183229
20.5	0.00245149
20.6	0.00087575
20.6	0.00135131
20.6	0.00148157
20.6	0.00287392
20.7	0.00121959
20.7	0.00182905
20.7	0.00385715
20.8	0.00068505
20.8	0.00167566
20.8	0.00215456
20.8	0.00238137
20.9	0.000234
20.9	0.00133201
20.9	0.00190765
20.9	0.00218858
21	1.5e-05
21	0.00091
21	0.00115728
21	0.00143
21	0.00146
21	0.00163389
21.1	0.00451231
21.2	0.00158772
21.3	0.00194205
21.4	0.00078201
21.4	0.00083022
21.4	0.00171635
21.4	0.0025253
21.4	0.00267
21.5	0.001049
21.5	0.00159944
21.6	0.00107298
21.6	0.00197926
21.7	0.00125732
21.7	0.001412
21.8	0.001801
21.8	0.00189993
21.9	0.00055025
21.9	0.00096735
21.9	0.00113065
21.9	0.00166322
22	0.00092289
22	0.00114
22	0.002209
22	0.0032
22.1	0.00078576
22.1	0.00082936
22.1	0.00102504
22.1	0.00110756
22.1	0.00113491
22.1	0.00233614
22.2	0.00097969
22.2	0.00120753
22.3	0.00093658
22.3	0.00100819
22.3	0.00106822
22.3	0.00194574
22.4	0.00072859
22.4	0.000893
22.4	0.00099185
22.4	0.00225338
22.5	0.00082307
22.5	0.00086539
22.5	0.00101537
22.6	0.00134536
22.6	0.00145101
22.7	0.0007887
22.7	0.00102765
22.7	0.00116122
22.8	0.00083488
23	1.6e-05
23	0.0005
23	0.00063094
23	0.00065891
23	0.00075968
23	0.00083755
23	0.00098
23	0.001042
23	0.001409
23	0.00175
23.1	0.001296
23.2	0.00141682
23.2	0.00142154
23.3	0.00058691
23.3	0.00068439
23.3	0.00082783
23.3	0.00114658
23.4	0.00178132
23.5	0.00061844
23.5	0.00080267
23.5	0.00086879
23.5	0.00090994
23.5	0.00225409
23.5	0.00246391
23.6	0.00073623
23.6	0.00076299
23.6	0.00078874
23.7	0.0006013
23.7	0.00061911
23.7	0.00118815
23.7	0.00164333
23.7	0.00189578
23.7	0.00254809
23.8	0.00065939
23.8	0.00078051
23.8	0.00082574
23.8	0.00124118
23.8	0.006735
23.9	0.00052144
23.9	0.00075888
23.9	0.00095486
23.9	0.001181
23.9	0.00206132
24	2.6e-05
24	0.00086
24	0.0009
24	0.00151054
24	0.00229
24	0.0130214
24.2	0.0004
24.2	0.00122115
24.2	0.00132422
24.3	0.00048768
24.3	0.00088315
24.3	0.001517
24.3	0.00166166
24.4	0.00051849
24.4	0.0017206
24.5	0.0017907
24.5	0.00237066
24.6	0.00051672
24.6	0.00185144
24.6	0.00191885
24.8	5.6e-05
24.8	0.00113367
24.9	0.00086511
25	1.7e-05
25	0.00086
25	0.00121376
25	0.00156
25	0.00171589
25	0.00179976
25.1	0.00103825
25.1	0.00117153
25.1	0.00240657
25.2	2.2e-05
25.2	0.00110971
25.2	0.00115717
25.2	0.002206
25.2	0.002529
25.3	0.00073324
25.3	0.001173
25.3	0.00241002
25.3	0.004264
25.4	0.001147
25.4	0.00372342
25.5	0.00091147
25.5	0.00102038
25.5	0.00142577
25.6	0.00081916
25.6	0.00129135
25.6	0.00129346
25.7	0.00072136
25.7	0.00147201
25.7	0.001605
25.8	1.5e-05
25.8	0.00089675
25.8	0.00091897
25.8	0.00096779
25.8	0.000972
25.8	0.00116227
25.8	0.00124117
25.8	0.0018927
25.8	0.00744865
25.9	0.00067614
25.9	0.00068518
25.9	0.000919
25.9	0.0010364
25.9	0.00112593
26	1.4e-05
26	2.4e-05
26	3.2e-05
26	3.2e-05
26	0.0006742
26	0.00084041
26	0.00086
26	0.000906
26	0.00129761
26	0.001587
26	0.00176
26	0.0019301
26	0.00848505
26.1	0.00073143
26.1	0.000828
26.1	0.001005
26.1	0.001098
26.1	0.00116102
26.1	0.00122914
26.1	0.001506
26.2	0.000663
26.2	0.00079018
26.2	0.00094446
26.2	0.00111545
26.2	0.001381
26.3	0.00067821
26.3	0.00096897
26.4	0.000753
26.4	0.001085
26.4	0.00144822
26.4	0.001567
26.4	0.001733
26.5	0.00064
26.5	0.00229
26.6	1.7e-05
26.6	1.8e-05
26.6	2e-05
26.6	2.4e-05
26.6	0.00098078
26.6	0.001103
26.6	0.00138551
26.7	3e-05
26.7	0.001403
26.7	0.00164642
26.8	2e-05
26.8	0.000702
26.8	0.00083558
26.8	0.00094043
26.8	0.000996
26.8	0.001287
26.9	3.4e-05
26.9	0.00089689
26.9	0.001058
27	1.6e-05
27	1.8e-05
27	1.8e-05
27	1.9e-05
27	2e-05
27	3e-05
27	0.00104
27	0.00114
27	0.00115191
27	0.00133656
27	0.001441
27	0.001589
27	0.00194
27.1	1.6e-05
27.1	0.00077664
27.1	0.001802
27.2	2.6e-05
27.2	3.2e-05
27.3	2e-05
27.3	2.2e-05
27.3	2.4e-05
27.3	0.0005
27.3	0.000613
27.4	0.0006
27.4	0.002694
27.5	1.1e-05
27.5	0.00086962
27.6	0.00073116
27.6	0.00102
27.6	0.00154316
27.7	2e-05
27.7	2.6e-05
27.7	2.8e-05
27.7	0.00143647
27.9	1.7e-05
27.9	0.00095479
27.9	0.00127079
28	1.9e-05
28	2e-05
28	2e-05
28	2.2e-05
28	2.8e-05
28	0.00073
28	0.00086
28	0.0013472
28	0.001614
28	0.001633
28	0.001649
28	0.00215338
28.1	0.00106969
28.1	0.001093
28.1	0.0011761
28.1	0.001206
28.2	1.8e-05
28.2	1.9e-05
28.2	2.2e-05
28.2	5e-05
28.2	0.00091711
28.2	0.001664
28.3	1.7e-05
28.3	2.8e-05
28.3	0.00072419
28.3	0.00143963
28.4	0.00057997
28.4	0.00086995
28.4	0.00088385
28.4	0.00091124
28.4	0.00116992
28.4	0.00137104
28.5	0.0005774
28.5	0.00136883
28.6	0.00084056
28.6	0.00088847
28.6	0.00114463
28.6	0.00118096
28.6	0.0013
28.6	0.00149792
28.6	0.00159346
28.6	0.001683
28.6	0.0018977
28.6	0.0019413
28.7	0.000741
28.7	0.0010791
28.7	0.00129905
28.7	0.00163917
28.8	0.00082624
28.8	0.001052
28.8	0.00123598
28.8	0.00130439
28.8	0.0014573
28.8	0.00160931
28.8	0.00193356
28.9	1.7e-05
28.9	2.2e-05
28.9	3.6e-05
28.9	0.00140025
28.9	0.00147302
28.9	0.00207492
29	3.2e-05
29	4.4e-05
29	0.00053
29	0.00072847
29	0.00074613
29	0.00107025
29	0.00119
29	0.00126901
29	0.00137575
29	0.001454
29	0.00159709
29	0.00220696
29.1	0.0005
29.1	0.00057095
29.1	0.00062684
29.1	0.00091011
29.1	0.00122657
29.1	0.00151726
29.1	0.00173514
29.1	0.00191761
29.1	0.00232314
29.1	0.00260145
29.2	0.0008625
29.3	0.00084448
29.3	0.00102329
29.3	0.001067
29.3	0.00156125
29.3	0.00160461
29.3	0.0017945
29.3	0.00180879
29.3	0.00205024
29.3	0.00286431
29.4	0.000534
29.4	0.00088216
29.4	0.00095683
29.4	0.0021604
29.5	0.0008
29.5	0.00084479
29.5	0.00101607
29.5	0.00111021
29.5	0.00117628
29.5	0.00136539
29.6	0.00110554
29.6	0.00138322
29.6	0.00163899
29.6	0.00209583
29.6	0.00414722
29.7	0.00094741
29.7	0.00112
29.7	0.00147379
29.7	0.00150471
29.7	0.00206129
29.8	0.00080875
29.8	0.00084725
29.8	0.00215901
29.8	0.00248053
29.9	0.00095119
30	1.4e-05
30	2e-05
30	2.2e-05
30	2.2e-05
30	0.00074
30	0.0008316
30	0.00092683
30	0.00101932
30	0.00124941
30	0.0016758
30	0.002106
30	0.0022419
30	0.00888997
30.1	0.00064126
30.1	0.00092001
30.1	0.001418
30.1	0.00183441
30.1	0.00227937
30.2	0.00065505
30.2	0.00072626
30.2	0.00072643
30.2	0.00123803
30.2	0.00147711
30.3	0.00169457
30.3	0.00268705
30.4	0.0005
30.4	0.00060207
30.4	0.00090145
30.4	0.000949
30.4	0.0015611
30.4	0.00190991
30.5	0.0006
30.5	0.00144602
30.5	0.00199514
30.5	0.00268353
30.6	0.00057933
30.6	0.00100844
30.6	0.00107954
30.7	0.00044656
30.7	0.00061784
30.7	0.00070346
30.7	0.00101187
30.7	0.00206095
30.7	0.00219929
30.7	0.00288632
30.8	0.00083361
30.8	0.00123547
30.8	0.00143184
30.8	0.00163574
30.8	0.00194952
30.9	0.000508
30.9	0.00098627
30.9	0.00143927
30.9	0.00156167
30.9	0.00159946
30.9	0.00204493
30.9	0.00209008
30.9	0.00226911
30.9	0.00227651
30.9	0.00240216
31	1.9e-05
31	2e-05
31	2.6e-05
31	0.000544
31	0.00091674
31	0.00112354
31	0.0011273
31	0.00146427
31	0.0016
31	0.00233
31	0.00265927
31.1	0.00124386
31.1	0.0018799
31.1	0.00189536
31.1	0.00211336
31.2	0.00074087
31.2	0.000741
31.2	0.001207
31.2	0.00141875
31.2	0.00177045
31.2	0.00184882
31.2	0.00209939
31.2	0.00228736
31.2	0.00273501
31.3	2.8e-05
31.3	0.00059185
31.3	0.00062042
31.3	0.00065699
31.3	0.00116168
31.3	0.00141368
31.3	0.00172394
31.3	0.00179133
31.3	0.00218351
31.3	0.00285648
31.4	0.00106434
31.4	0.00171145
31.4	0.00228445
31.5	0.00115279
31.6	0.00038766
31.6	0.00123833
31.6	0.00128299
31.6	0.00132342
31.6	0.00204873
31.6	0.0022774
31.6	0.00280752
31.6	0.00328789
31.7	0.00117309
31.7	0.00233859
31.7	0.00236666
31.7	0.00280813
31.8	0.001436
31.8	0.00174448
31.8	0.00190654
31.8	0.00224924
31.9	2e-05
31.9	0.00092041
31.9	0.00154737
31.9	0.00239148
31.9	0.00264686
31.9	0.002978
32	1.8e-05
32	1.9e-05
32	2.2e-05
32	6.6e-05
32	9.2e-05
32	0.000689
32	0.00127805
32	0.00141
32	0.00205128
32	0.00216753
32	0.00378808
32	0.00841417
32.1	0.00087332
32.1	0.00199885
32.2	0.0008
32.2	0.000878
32.2	0.00156023
32.3	0.00081665
32.3	0.000834
32.3	0.00086
32.4	0.00101639
32.4	0.0011
32.5	0.00051754
32.5	0.00062342
32.5	0.00112766
32.5	0.00137685
32.5	0.0018
32.6	0.000939
32.6	0.0018
32.7	0.00013776
32.7	0.0007
32.7	0.000741
32.7	0.001
32.7	0.001337
32.9	0.000996
32.9	0.00114639
33	1.8e-05
33	2e-05
33	2.4e-05
33	3.6e-05
33	4.2e-05
33	0.000773
33	0.00084137
33	0.00089222
33	0.0015739
33	0.0018954
33	0.00194173
33	0.00222
33	0.00232662
33	0.0026456
33	0.0048148
33	0.0104286
33.1	0.000895
33.2	0.00126162
33.3	0.0009108
33.4	0.001735
33.6	0.00102
33.6	0.001072
33.6	0.00109881
33.6	0.00155509
33.6	0.0032
33.6	0.00321
33.6	0.00321
33.6	0.00321
33.7	0.000572
33.7	0.00070883
33.7	0.00077143
33.7	0.00084945
33.7	0.00130844
33.7	0.00171694
33.7	0.00261
33.8	7.118e-05
33.8	0.00130118
33.9	0.00086495
33.9	0.000981
33.9	0.0010039
33.9	0.00136603
34	1.7e-05
34	2e-05
34	0.000247
34	0.00059958
34	0.00115144
34	0.0012
34	0.001551
34	0.0015935
34	0.00162009
34	0.0017085
34	0.00189385
34	0.0019098
34	0.0021098
34	0.0022284
34	0.0024157
34	0.0024614
34	0.00252
34	0.00258016
34	0.00946311
34	0.0131518
34	0.0143029
34.1	0.00040451
34.1	0.00046434
34.1	0.00055356
34.1	0.00065299
34.1	0.00074659
34.1	0.00090481
34.1	0.00090749
34.1	0.00118394
34.1	0.00133356
34.1	0.00144646
34.2	7.967e-05
34.2	0.00025368
34.2	0.00103173
34.2	0.00142475
34.2	0.001809
34.3	0.00019717
34.3	0.000486
34.3	0.00053829
34.3	0.0006105
34.3	0.00141212
34.3	0.00178027
34.3	0.001937
34.3	0.00196458
34.3	0.00209236
34.3	0.00224219
34.4	0.00070552
34.4	0.00079
34.4	0.00096857
34.4	0.0010426
34.4	0.00187982
34.4	0.00196169
34.4	0.00197163
34.5	0.0016
34.5	0.0017139
34.6	0.00089167
34.6	0.00115781
34.6	0.00129977
34.6	0.0013441
34.6	0.00195334
34.7	5.053e-05
34.7	0.00045354
34.7	0.000713
34.7	0.0008
34.7	0.00081969
34.7	0.00088665
34.7	0.00097312
34.7	0.00100191
34.7	0.00101552
34.7	0.00101696
34.7	0.00170091
34.7	0.00199694
34.7	0.00208991
34.7	0.00229664
34.8	0.00074882
34.8	0.00091043
34.8	0.00121435
34.8	0.00125788
34.8	0.00136231
34.8	0.0014287
34.8	0.00145451
34.8	0.0015
34.8	0.00180448
34.8	0.00191251
34.9	0.00024471
34.9	0.00133
34.9	0.001481
34.9	0.002
34.9	0.00265622
35	1.1e-05
35	2.2e-05
35	2.4e-05
35	3e-05
35	4.2e-05
35	9.092e-05
35	0.000492
35	0.00056
35	0.00060518
35	0.00065238
35	0.00068
35	0.0008
35	0.00086
35	0.00087
35	0.00102
35	0.0013
35	0.0013661
35	0.001368
35	0.00151754
35	0.00172203
35	0.0019807
35	0.00207314
35	0.0021817
35	0.002378
35	0.002511
35	0.0025541
35	0.0028684
35	0.0030365
35	0.003552
35	0.00941455
35.1	0.00082142
35.1	0.00099945
35.1	0.0010711
35.1	0.00141392
35.1	0.00148373
35.1	0.00158223
35.2	0.0004827
35.2	0.00069136
35.2	0.00103
35.2	0.00125246
35.2	0.00132946
35.2	0.00141372
35.2	0.00156577
35.2	0.0022
35.3	0.00066717
35.3	0.00132308
35.3	0.00158949
35.3	0.0088
35.4	0.0004936
35.4	0.000641
35.4	0.00101603
35.4	0.00126505
35.4	0.00141889
35.4	0.00168368
35.4	0.0017
35.4	0.00171874
35.4	0.00184886
35.5	0.00034201
35.5	0.00095324
35.5	0.0012363
35.5	0.0015
35.5	0.00346495
35.5	0.00394359
35.6	0.00047129
35.6	0.00068508
35.6	0.00073896
35.6	0.00087287
35.6	0.00135568
35.6	0.0016
35.6	0.00168912
35.6	0.00169695
35.6	0.00192976
35.6	0.00219588
35.6	0.00276959
35.7	0.00071287
35.7	0.00090982
35.7	0.00097759
35.7	0.001265
35.7	0.00128683
35.7	0.00142731
35.7	0.00153704
35.7	0.00154697
35.7	0.00183695
35.8	0.00062756
35.8	0.0008
35.8	0.00094033
35.8	0.00102373
35.8	0.00105018
35.8	0.00148249
35.8	0.00193241
35.8	0.00201582
35.8	0.00488642
35.9	0.00027522
35.9	0.00064595
35.9	0.00117674
35.9	0.00148841
35.9	0.0016
35.9	0.0019
35.9	0.00199372
35.9	0.002
35.9	0.00218311
35.9	0.00219131
36	2.2e-05
36	0.0002231
36	0.00026267
36	0.0002932
36	0.00049468
36	0.00056
36	0.00059829
36	0.00064
36	0.000667
36	0.00066778
36	0.00087118
36	0.00088
36	0.00094
36	0.00108845
36	0.00120136
36	0.00120897
36	0.00124474
36	0.00139681
36	0.00167
36	0.0018115
36	0.002014
36	0.0025289
36	0.00286184
36	0.00426665
36	0.0087595
36	0.00897027
36.1	0.000935
36.1	0.0011
36.1	0.00114731
36.1	0.00126
36.1	0.00148899
36.1	0.0018
36.1	0.00229029
36.1	0.0079
[truncated: 122,478 more rows]

## Sheet: Oxygen dataset
Oxygen global dataset
						FILTERED	TOTAL DATA
Spencer et al. 2014						6294	6372
Median	δ18O		δ18O		2 s.e.
Age	unfiltered	n.	filtered	n.
71.5	6.5	414	6.5	405	0.141835
133	6.7	948	6.8	941	0.0971403
233	7.6	252	7.6	243	0.26654
352	6.2	128	6.2	128	0.292062
430	7.2	283	7.2	279	0.173599
549	7.4	411	7.4	405	0.169553
629	7.4	237	7.4	236	0.212482
768	5.1	230	5.1	229	0.230452
814	5.9	211	5.9	210	0.245553
961	6.7	129	6.7	127	0.246591
1043	6.7	305	6.7	302	0.154654
1156	6.9	269	6.9	265	0.181806
1238.5	6.4	140	6.4	139	0.21899
1336	6.2	117	6.2	115	0.2251
1457	6.3	114	6.3	113	0.214751
1500.5	6.5	208	6.5	208	0.174951
1652	6.1	157	6.1	156	0.245248
1762	6.05	138	6.1	137	0.288442
1860	6.9	279	6.9	277	0.208872
1939	6.9	113	6.9	112	0.320831
2048	7	105	6.85	102	0.311981
2146	6.2	101	6.2	99	0.224205
2226.5	5.8	26	5.6	25	0.419924
2337	6.2	23	6.2	23	0.49622
2452	6.2	57	6.2	57	0.294112
2539	6	55	6	55	0.181045
2672	5.8	131	5.8	130	0.178905
2723.5	5.5	304	5.5	297	0.0770934
2827.5	5.5	70	5.5	69	0.181883
2944	5.8	41	5.8	41	0.266323
3028.5	5.15	12	5.15	12	0.609748
3152	5.6	52	5.6	51	0.211189
3241.5	5.8	24	5.8	24	0.356699
3380	6.5	21	6.5	21	0.203596
3436	6.1	23	6.1	23	0.290764
3560	5.8	15	5.9	14	0.39383
3636	5.65	26	5.7	25	0.439545
3754	5.8	17	5.85	16	0.242126
3869	5.7	29	5.8	28	0.402174
3945.5	5.9	44	5.9	43	0.303541
4037	6.2	27	6.2	27	0.200643
4140	6.3	41	6.3	41	0.201446
4232	5.7	38	5.7	38	0.232039
4328	5.55	6	5.55	6	0.549949
4404	5.4	1	-	0	-
Reference
Spencer, C.J., Cawood, P.A., Hawkesworth, C.J., Raub, T.D., Prave, A.R. and Roberts, N.M., 2014. Proterozoic onset of crustal reworking and collisional tectonics: Reappraisal of the zircon oxygen isotope record. Geology, 42(5), pp.451-454.

## Sheet: G50659
Moreira, H., et al., 2023, Plumbing the depths of magma crystallization using 176Lu/177Hf in zircon as a pressure proxy: Geology, https://doi.org/10.1130/G50659.1
